# Supplementary material for: Exploring the Integrated Role of miRNAs and lncRNAs in Regulating the Transcriptional Response to Amino Acids and Insulin-like Growth Factor 1 in Gilthead Sea Bream (Sparus aurata) Myoblasts
Source: MDPI journal article supplement (doi:10.3390/ijms25073894), 2024-03-31
Supplement: s1 [file s1]

**Table S1.** Predicted interactions between lncRNAs and mRNAs significantly modified in response to treatments.

| lncRNAs ID         | Genes                             | Correlation Index          | Energy -ndG (kcal/mol)      |
|--------------------|-----------------------------------|----------------------------|-----------------------------|
| ENSSAUG00010016143 | <i>acta1; rbm24b</i>              | -0.86; -0.90               | -0.10; -0.14                |
| ENSSAUG00010015941 | <i>h2az1</i>                      | -0.96                      | -0.10                       |
| ENSSAUG00010017089 | <i>acta1; pin1; tcima</i>         | -0.88; -0.81; -0.95        | -0.11-0.10; -0.10           |
| ENSSAUG00010012182 | <i>acta1; psmb3; tcima; tnni2</i> | -0.88; -0.91; -0.86; -0.90 | -0.15; -0.13; -0.10; -0.12; |
| ENSSAUG00010013622 | <i>nupr1a; rgcc</i>               | -0.88; -0.93               | -0.11; -0.12                |
| ENSSAUG00010015504 | <i>nupr1a</i>                     | -0.92                      | -0.12                       |
| ENSSAUG00010016109 | <i>nupr1a</i>                     | -0.85                      | -0.12                       |
| ENSSAUG00010017848 | <i>igfbp6a</i>                    | -0.85                      | -0.14                       |

The predicted interactions between lncRNAs and mRNAs shown are based on transcriptional correlations and bioinformatics analysis. Interactions with Pearson correlations lower than -0.80 and with predicted interaction energies lower than -0.10 kcal/mol are shown.
